# Supplementary material
Source: publisher figshare collection journal article supplement (https://gsajournals.figshare.com/ndownloader/files/17509994)
Supplement: Supplementary file 1 [file 17509994]

**Supplemental Table 1. Strains used in this study**

| Strain | Genotype |
| --- | --- |
| NC2951 | *oig-1(ok1687) III, acr-12 (ok367) X; lin-15 (n765ts) X; ufIs92 [lin-15+;Punc-47::ACR-12::GFP] X; wdEx954[Punc-25::3XFLAG::mCherry::oig-1; Pstr-1::gfp]* |
| NC3118 | *oig-1(ok1687) III; acr-12(ok367) X; wdIs91[Punc-25::3xFLAG::mCherry::OIG-1] III* |
| NC3058 | *TagRFP::oig-1::SEC::3XFLAG (wd106) III* |
| NC3112 | *TagRFP::oig-1::3XFLAG (wd111) III* |
| NC3292 | *oig-1::gfp11x7(wd114) III* |
| NC3383 | *oig-1::gfp11x7(wd114) III, acr-12(ok367) X; lin-15(nt76) X; ufIs92[Punc-47::ACR-12::GFP; lin15+] X* |
| NC3390 | *oig-1::gfp11x7(wd114) III; wdEx1034[Prab-3::GFP1-10; Pmyo-2::mCherry]* |
| NC3430 | *oig-1::gfp11x7(wd114) III; wdEx1051[Prab-3::SSGFP1-10; Pmyo-2::mCherry]* |
| NC3438 | *oig-1::gfp11x7 (wd114) III; wdEx1053[Pttr-39::GFP1-10; Pmyo-2::mCheery]* |
| NC3523 | *oig-1::gfp11x7(wd114) III; wdEx1034[Prab-3::GFP1-10; Pmyo-2::mCherry]; otIs355[Prab-3::NLS::mCherry]* |
| NC3524 | *oig-1::gfp11x7 (wd114) III; wdEx1053[Pttr-39::GFP1-10; Pmyo-2::mCheery]; wpIs39[Punc-47::mCherry]* |
| NC3404 | *wdEx1036[Prab-3::ssGFP1-10; Pflp-18::nlg-1::GFP11]* |
| NC3394 | *lev-10::gfp (wd117) I* |
| NC3405 | *wd115[lev-10::gfp11x7] I; wdEx1037[Pacr-2::GFP1-10; Pmyo-2::mCherry]* |
| NC3525 | *wd115[lev-10::gfp11x7] I; wdEx1111[Pacr-2::GFP1-10; Pmyo-2::mCherry; Punc-4::mCherry]* |
| NC3406 | *lev-10::gfp11x7 (wd116) I; wdEx1034[Prab-3::GFP1-10; Pmyo-2::mCherry]* |
| NC3492 | *lev-10::gfp11x7(wd116) I; wdEx1086[Pmyo-3::GFP1-10; Pmyo-2::mCherry]* |
| NC3526 | *lev-10::gfp11x7(wd116) I; wdEx1112[Pmyo-3::GFP1-10; Pmyo-2::mCherry; Pmyo-3::UNC-29::TagRFP];* |
| NC3493 | *lev-10::gfp11x7(wd116) I; wdEx1087[Pttr-39::GFP1-10; Pmyo-2::mCherry]* |
| NC3525 | *lev-10::gfp11x7(wd116) I; wdEx1087[Pttr-39::GFP1-10; Pmyo-2::mCherry]; wpIs39[Punc-47::mCherry]* |
| NC3506 | *lev-10::gfp11x7(wd116) I;; Ex[Pflp-13::GFP1-10;Pflp-13::LifeAct::mCherry; Pmyo-2::mCherry]* |
